# Supplementary material for: A direct Z-scheme heterojunction g-C3N4/α-Fe2O3 nanocomposite for enhanced polymer-containing oilfield sewage degradation under visible light
Source: Royal Society of Chemistry journal article supplement (doi:10.1039/d2ew00342b), 2022-01-01
Supplement: d2ew00342b1.pdf [file d2ew00342b1.pdf]

## *Supplementary Information*

# **A Direct Z-scheme Heterojunction g-C<sub>3</sub>N<sub>4</sub>/α-Fe<sub>2</sub>O<sub>3</sub> Nanocomposite for Efficiently Degrade Polymer-containing Oilfield Sewage under Visible Light**

*Xinqing Zhang,<sup>†, a,\*</sup> Li Xia,<sup>†, b</sup> Chao Liu,<sup>c</sup> Xiaobo Cheng,<sup>c</sup> and Zhi Yang<sup>c</sup>*

<sup>a</sup>. College of Petroleum Engineering, Xi'an Shiyou University, Xi'an 710065, China

<sup>b</sup>. College of Chemistry and Materials Science, Northwest University, Xi'an 710127, China

<sup>c</sup>. No. 1 oil production plant, PetroChina Changqing Oilfield, Xi'an 710000, China

### Author Contributions

<sup>†</sup>. These authors contributed equally to this work.

### Corresponding authors:

Xinqing Zhang

E-mail address: [xqzhang5464@126.com](mailto:xqzhang5464@126.com)

## Materials and methods

### Materials and Instruments

**Materials.** All starting materials, reagents and solvents used in experiments were commercially available, high-grade purity materials and used without further purification. Urea, Isopropanol (IPA, 95%), Nafion, and FeCl<sub>3</sub> (PPOA, >98.0%) were purchased from Aladdin; Sulfuric acid (H<sub>2</sub>SO<sub>4</sub>, 75%~80%), Ethanol (CH<sub>3</sub>CH<sub>2</sub>OH, 99%) and Sodium acetate (CH<sub>3</sub>COONa) were purchased from Adams-beta.

**Instruments.** Zeta ( $\zeta$ )-potential data were obtained using a Zeta sizer Nano-ZS (Malvern Instruments, U.K.), the NCs were dispersed in EtOH solutions. Powder XRD (Rigaku, Japan) results were recorded on a D/MAX-RB diffractometer. Morphological structures and microscopic details were evaluated by SEM (JSM-7500F, JEOL) and TEM (JEM-2100F, JEOL). To estimate the surface elemental composition and chemical states of the samples, XPS measurements were performed on an ESCALAB 250 Xi electron spectrometer (Thermo Scientific Corporation, USA). The UV-vis DRS were employed to investigate the optical properties of the samples on the Shimadzu UV 2550 UV-vis spectrometer. The evaluation of PL spectra was carried out using a Hitachi F-7000 fluorescence spectrophotometer under the excitation of 365 nm UV light source. The time-resolved PL spectroscopy was recorded on a FLS 920 spectrometer (Edinburgh Instruments) with a 345 nm laser as the light source.

### Synthesis

**Synthesis of g-C<sub>3</sub>N<sub>4</sub> Nanosheets:** The g-C<sub>3</sub>N<sub>4</sub> nanosheets were obtained by exfoliation of bulk g-C<sub>3</sub>N<sub>4</sub> in isopropanol (IPA) and water mixture solvent based on the previous work <sup>1</sup>. Typically, bulk g-C<sub>3</sub>N<sub>4</sub> was synthesized by heating 10 g of urea in the muffle-furnace at 550 °C for 2 h. Subsequently, 300 mg of bulk g-C<sub>3</sub>N<sub>4</sub> was dispersed into the mixture solvent of 100 mL IPA and 50 mL water by sonication for 2 h to obtain the g-C<sub>3</sub>N<sub>4</sub> nanosheet suspension.

**Synthesis of  $\alpha$ -Fe<sub>2</sub>O<sub>3</sub> Hexagonal Nanoplates:** The  $\alpha$ -Fe<sub>2</sub>O<sub>3</sub> hexagonal nanoplates were fabricated based on the previous report <sup>2</sup>. Accordingly, 2.0 mmol of FeCl<sub>3</sub> was dissolved into a mixture solvent containing 20 mL of ethanol and 1.4 mL of water under vigorous magnetic stirring. After complete dissolution of the FeCl<sub>3</sub>, 1.6 g of sodium acetate was added under continuous stirring. Subsequently, the homogenous solution was transferred into a 50 mL Teflon-lined vial sealed with stainless steel jacket and held at 180 °C for 12 h. The resulting precipitate was rinsed with DI water and ethanol several times, and dried at 80 °C overnight yielding the  $\alpha$ -Fe<sub>2</sub>O<sub>3</sub> hexagonal nanoplates.

**Construction of  $\alpha$ -Fe<sub>2</sub>O<sub>3</sub>/g-C<sub>3</sub>N<sub>4</sub> Composites:** The  $\alpha$ -Fe<sub>2</sub>O<sub>3</sub>/g-C<sub>3</sub>N<sub>4</sub> composites were prepared by an electrostatic self-assembly approach based on the previous report <sup>3</sup>. A certain amount of g-C<sub>3</sub>N<sub>4</sub> nanosheet suspension was pipetted out from its original suspension, and then the pH value was adjusted to 6 by adding 0.2 M H<sub>2</sub>SO<sub>4</sub> solution. Subsequently, different amounts of  $\alpha$ -Fe<sub>2</sub>O<sub>3</sub> powder were added into the above suspension under sonication of 0.5 h and a homogenous suspension was obtained after 4 h of stirring. Then, the solvents were removed by rotary evaporation. The resultant mixture powders were washed by DI water and methanol a few times and dried in the oven at 80 °C overnight. The obtained photocatalysts with different weight ratios were denominated as g-C<sub>3</sub>N<sub>4</sub>/ $\alpha$ -Fe<sub>2</sub>O<sub>3</sub> (3:1), g-C<sub>3</sub>N<sub>4</sub>/ $\alpha$ -Fe<sub>2</sub>O<sub>3</sub> (2:1), g-C<sub>3</sub>N<sub>4</sub>/ $\alpha$ -Fe<sub>2</sub>O<sub>3</sub> (1:1), g-C<sub>3</sub>N<sub>4</sub>/ $\alpha$ -Fe<sub>2</sub>O<sub>3</sub> (1:2) and g-C<sub>3</sub>N<sub>4</sub>/ $\alpha$ -Fe<sub>2</sub>O<sub>3</sub> (1:1), respectively.

### **Electrochemistry measurements.**

All electrochemical measurements (photocurrent, the Mott–Schottky spots and EIS) were carried out with a CHI 660E electrochemical workstation via a conventional three-electrode system in a 0.2 M Na<sub>2</sub>SO<sub>4</sub> aqueous solution (pH = 6.8). The working electrode was ITO glass plates coated with a catalyst slurry, the counter electrode was a platinum foil, and the reference electrode was a saturated Ag/AgCl electrode. The Mott-Schottky plots were also measured over an alternating current (AC) frequency

of 500 Hz, 800 Hz and 1000 Hz. These three electrodes were immersed in the 0.2 M Na<sub>2</sub>SO<sub>4</sub> aqueous solution. Electrochemical impedance spectra (EIS) measurements were recorded over a frequency range of 100 kHz – 0.1 Hz with ac amplitude of 20 mV at 0 V, and 0.2 M Na<sub>2</sub>SO<sub>4</sub> aqueous solution was used as the supporting electrolyte.

Preparation of the working electrode: 2 mg photocatalyst were dispersed in a mixed solution of 990  $\mu$ L ethanol and 10  $\mu$ L Nafion D-520 dispersion solutions to generate a homogeneous slurry. Subsequently, 200  $\mu$ L of slurry was transferred and coated on ITO glass plates (1 cm  $\times$  2 cm) then dried at room temperature. The Ag/AgCl electrode was employed as the reference electrode, and platinum plate was used as the counter electrode, respectively.

### **Photocatalytic experiments**

The photocatalytic activity of a sample was evaluated by degradation of HPAM solution under visible light irradiation. The solution was illuminated vertically using a 300-W Xe lamp (PLS-SXE300UV, Beijing Perfect Light Co., Ltd.) with a UV cut-off filter ( $\lambda \geq 420$  nm). Degradation of HPAM was performed in a 100 mL glass reactor with an ice bath to maintain the solution at 0 °C. HPAM solution (50 mL, 30 mg·L<sup>-1</sup>) mixed with 10 mg photocatalyst was placed into the glass reactor. Before a photocatalytic measurement was carried out, the mixed solution was continuously stirred in dark condition for 60 min to achieve adsorption-desorption equilibrium. A sample used as a dark control was wrapped with aluminum foil and kept in dark environment. After the photocatalytic reaction starts, 3 mL of the suspension was taken every 20 minutes, and the concentration of HPAM was determined by spectrophotometer at a wavelength of 610 nm.

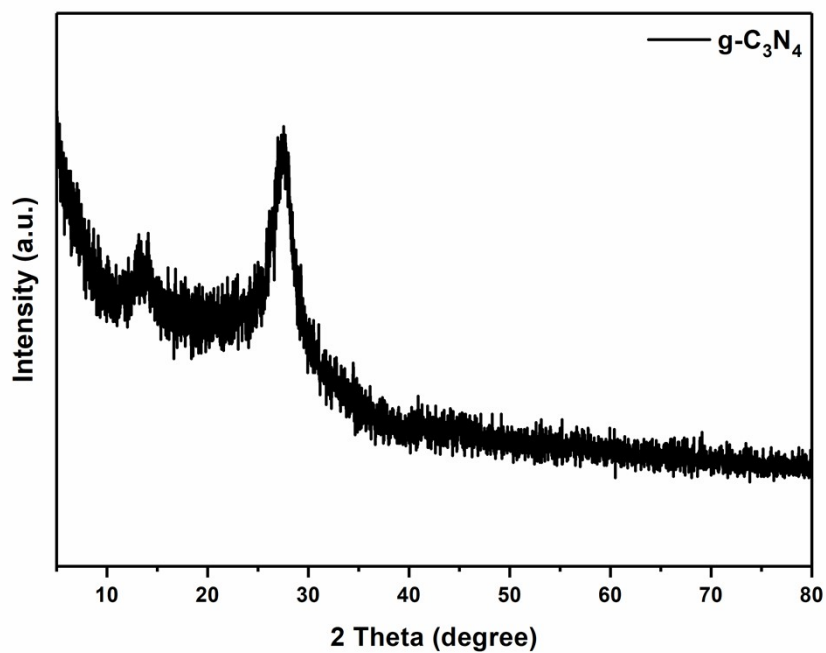

Figure S1. XRD of g-C<sub>3</sub>N<sub>4</sub>.

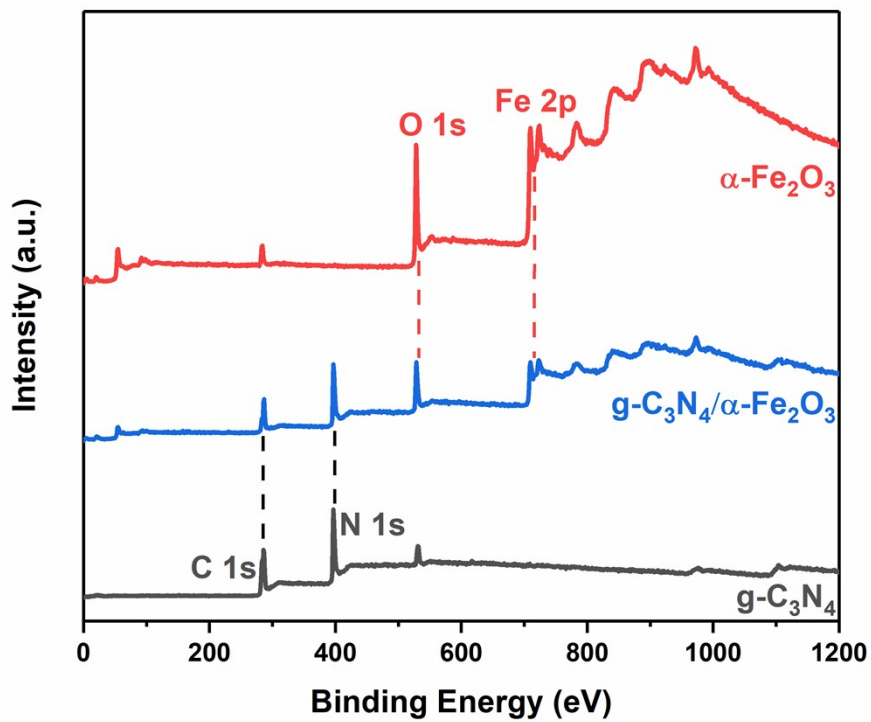

Figure S2. XPS survey spectrum of  $\alpha$ -Fe<sub>2</sub>O<sub>3</sub>, g-C<sub>3</sub>N<sub>4</sub> and g-C<sub>3</sub>N<sub>4</sub>/ $\alpha$ -Fe<sub>2</sub>O<sub>3</sub> (1:2).

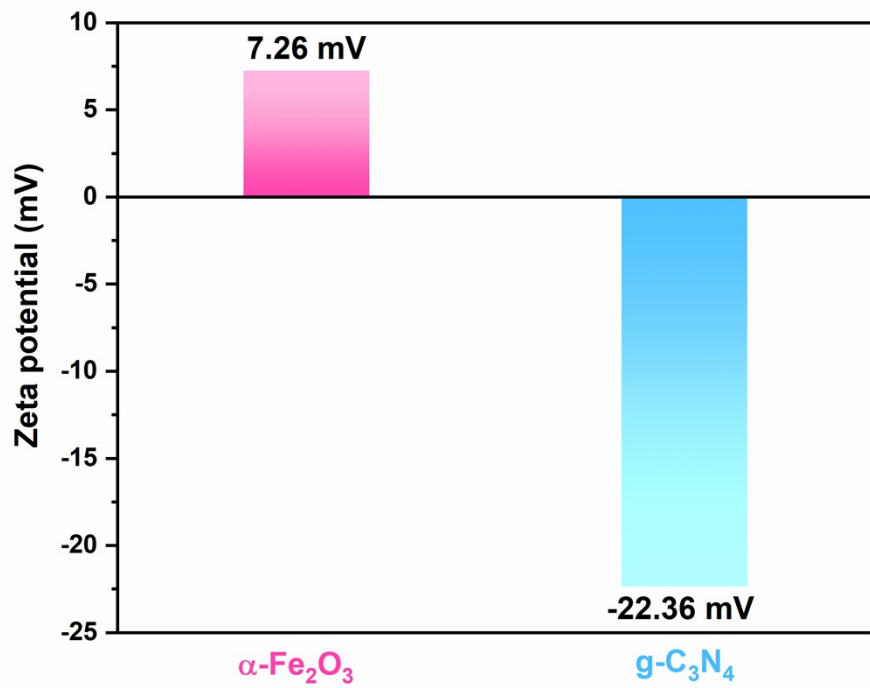

Figure S3. Zeta potential of  $\text{g-C}_3\text{N}_4$  and  $\text{Fe}_2\text{O}_3$  dispersed in DI water at pH = 6.

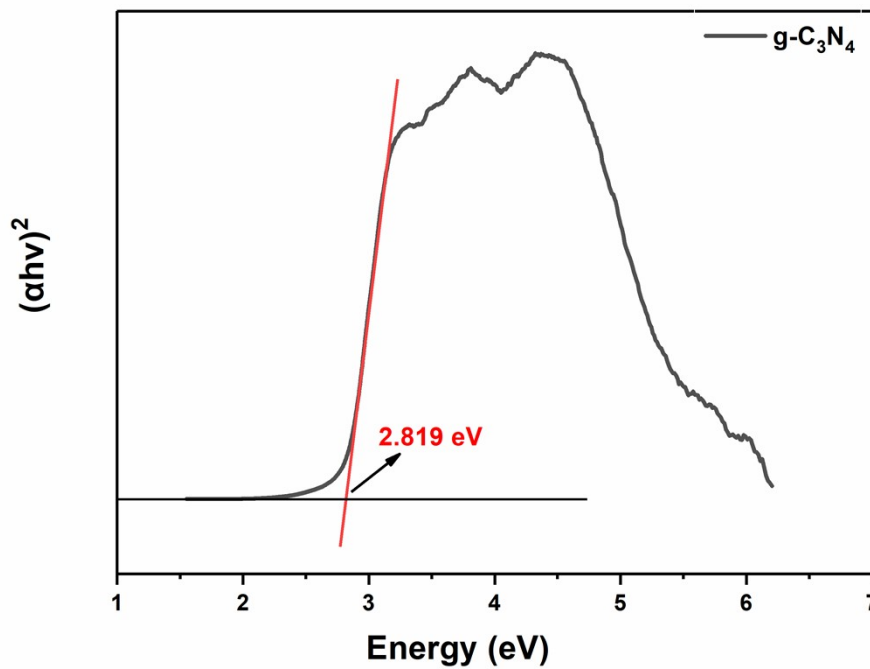

Figure S4. plots of  $(\alpha h\nu)^2$  versus photon energy of  $\text{g-C}_3\text{N}_4$ .

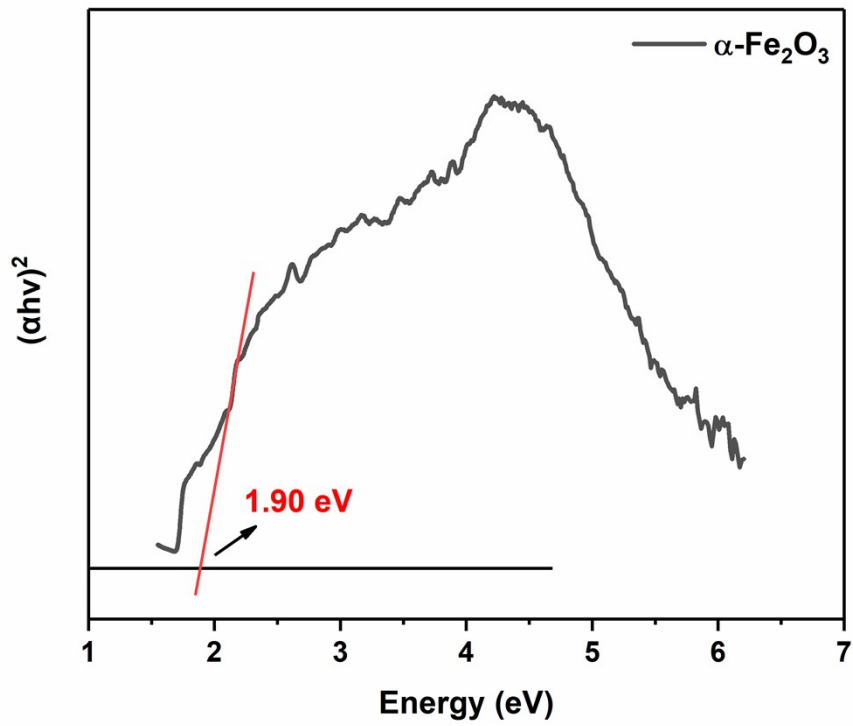

Figure S5. plots of  $(\alpha h\nu)^2$  versus photon energy of  $\alpha\text{-Fe}_2\text{O}_3$ .

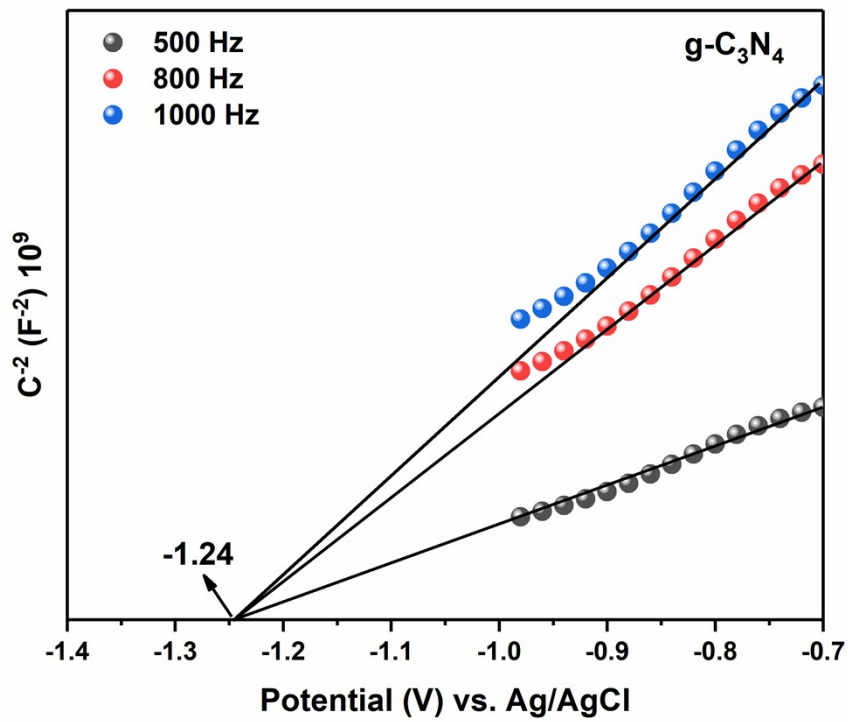

Figure S6. M-S plots of  $\text{g-C}_3\text{N}_4$  samples.

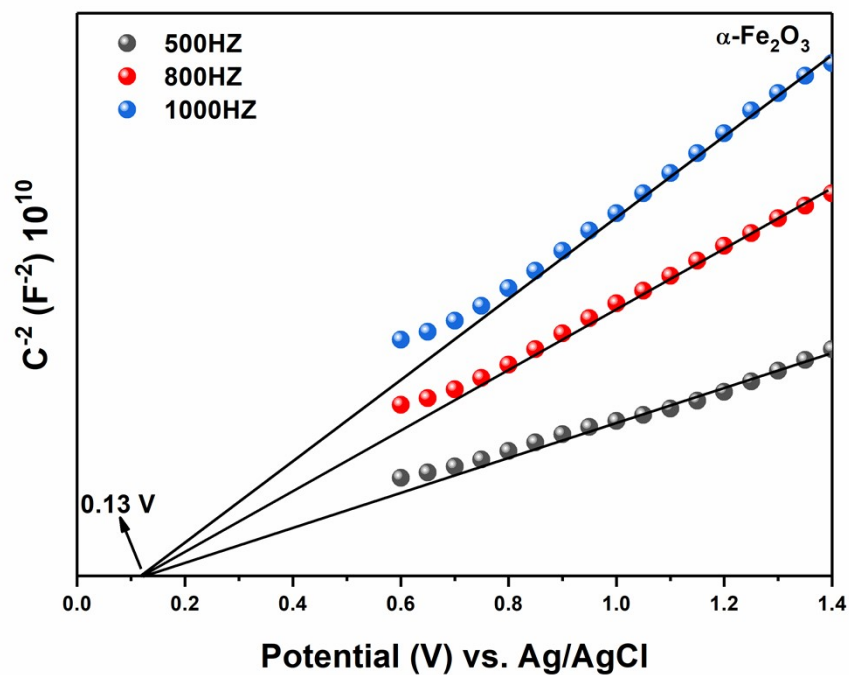

Figure S7. M-S plots of  $\alpha\text{-Fe}_2\text{O}_3$  samples.

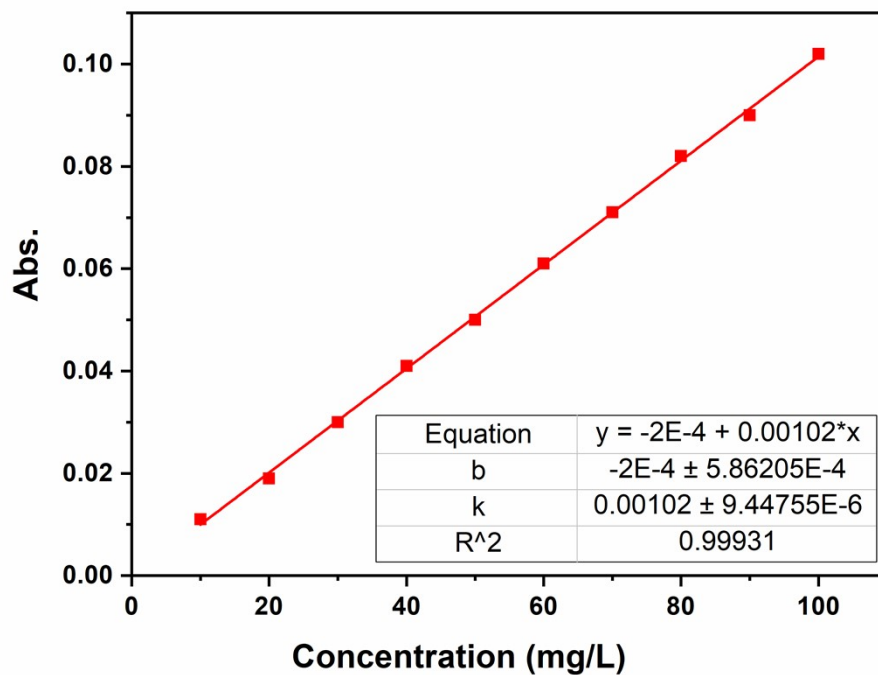

Figure S8. The standard curve of HAPM concentration.



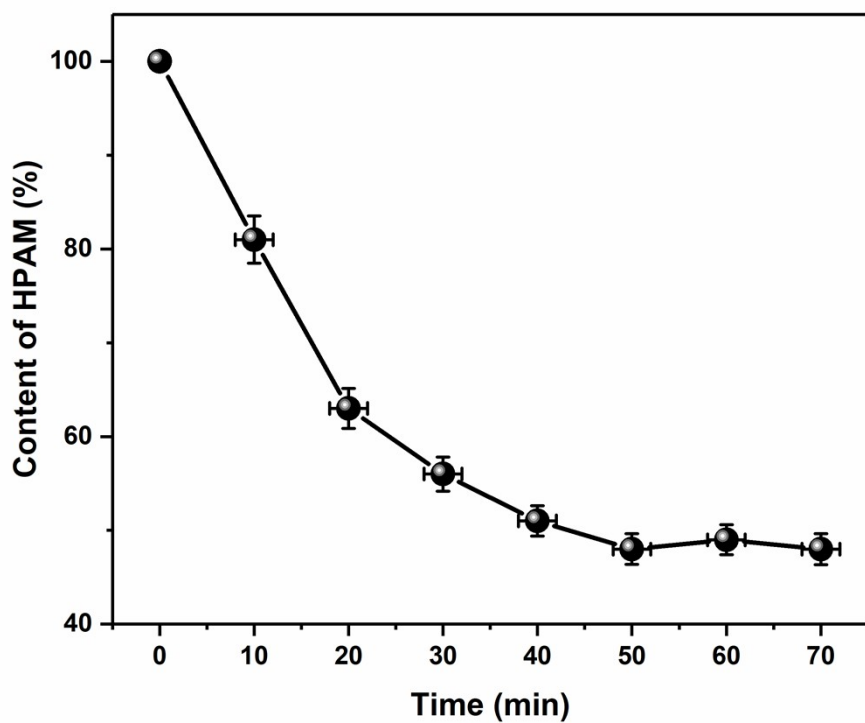

Figure S9. HPAM adsorption equilibrium test under dark conditions.

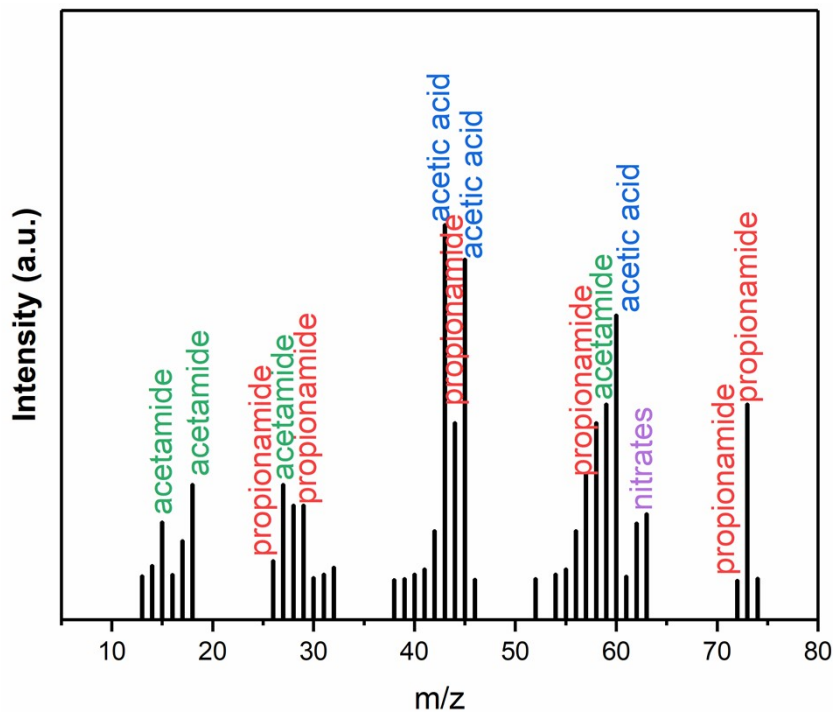

Figure S10. Mass spectrum of photocatalytically degraded HPAM under visible light irradiation showing detection of acetic acid, acetamide, propionamide and nitrate formed photocatalytic treatment as recorded using triple LC-MS.

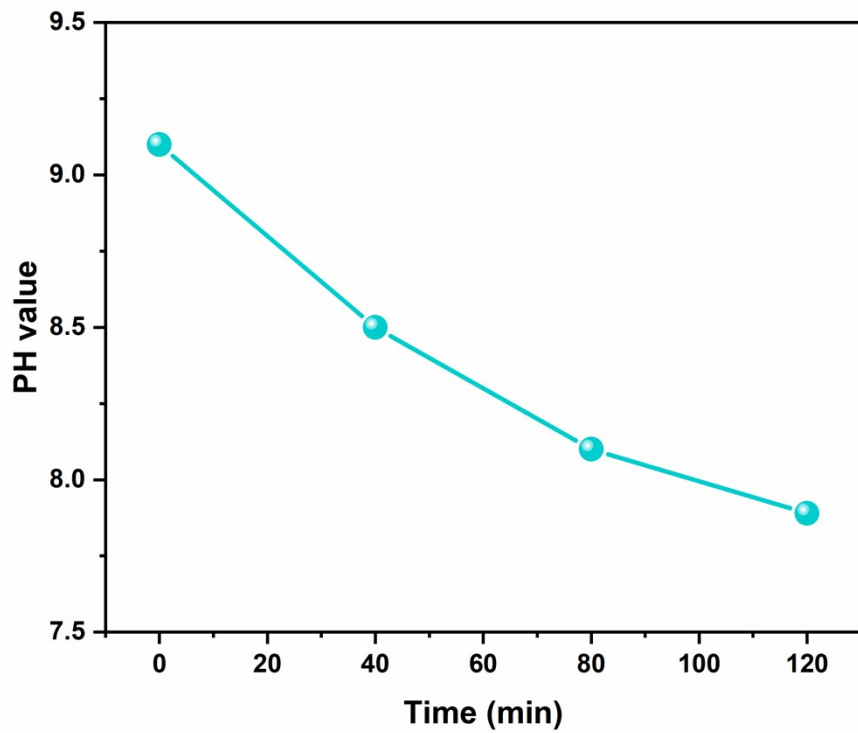

Figure S11. Change in pH of HPAM solution under visible light irradiation. The pH of the solution was measured at 40-minute time interval.

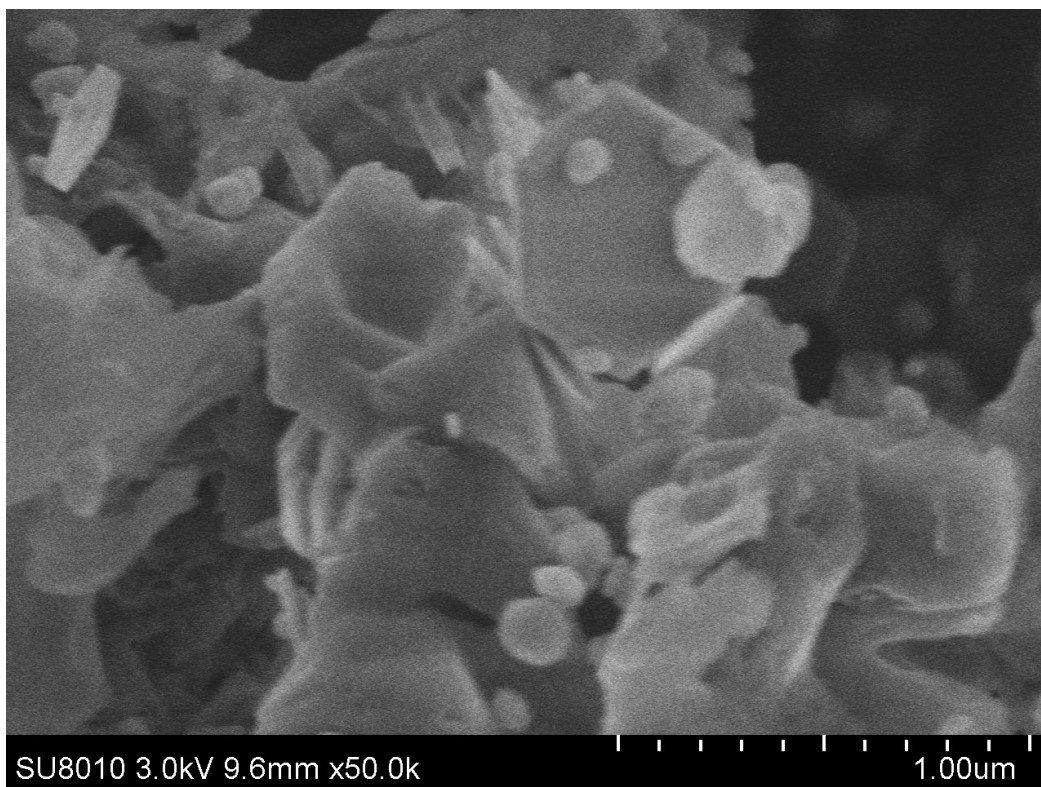

Figure S12. the SEM image of  $g\text{-C}_3\text{N}_4/\alpha\text{-Fe}_2\text{O}_3$  (1:2) after four times photocatalytic cycle.

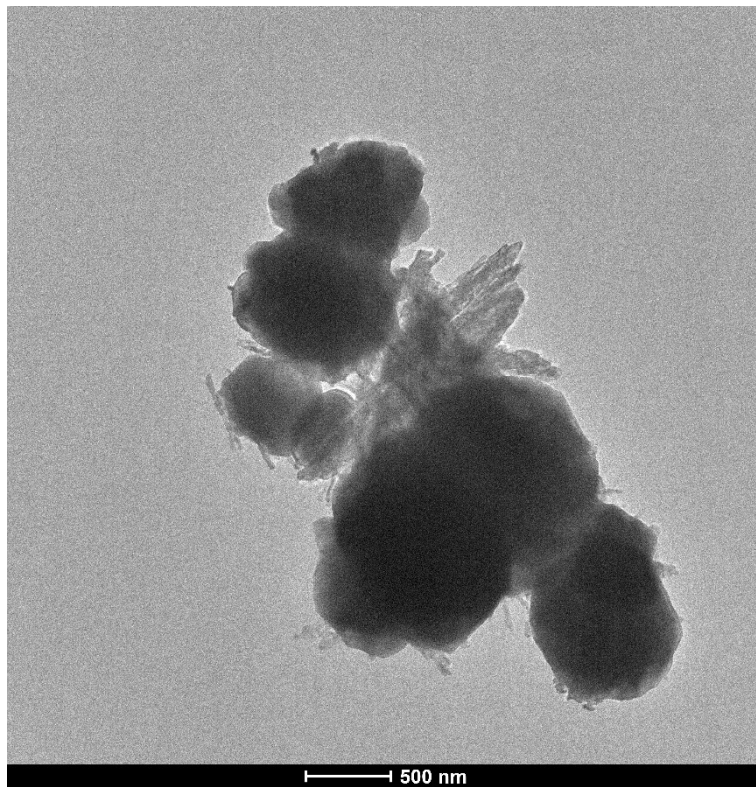

Figure S13. the TEM image of  $g\text{-C}_3\text{N}_4/\alpha\text{-Fe}_2\text{O}_3$  (1:2) after four times photocatalytic cycle.

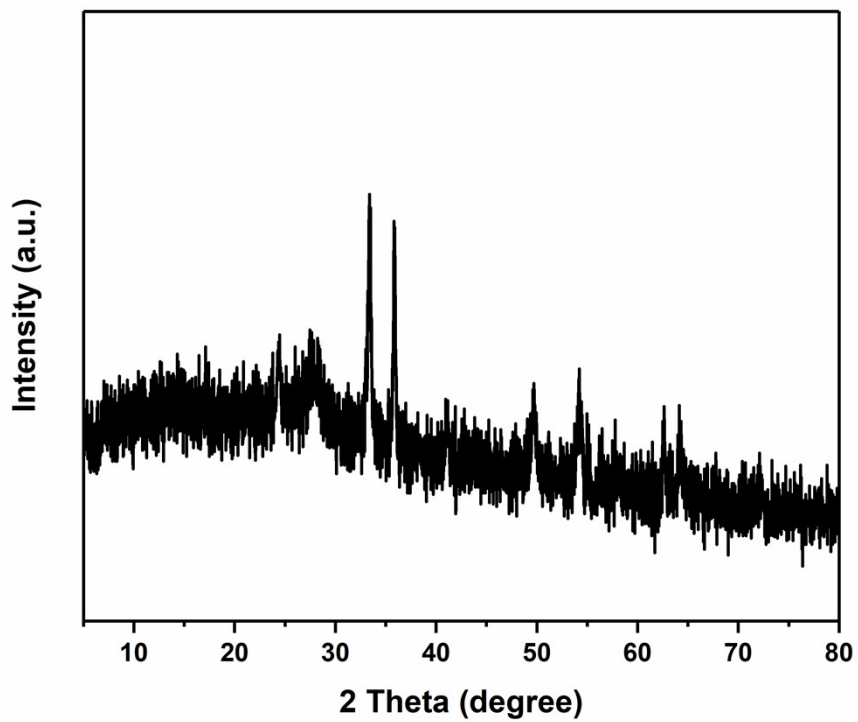

Figure S14. the XRD of  $g\text{-C}_3\text{N}_4/\alpha\text{-Fe}_2\text{O}_3$  (1:2) after four times photocatalytic cycle.

**Table S1.** The photocatalyst g-C<sub>3</sub>N<sub>4</sub>/α-Fe<sub>2</sub>O<sub>3</sub> (1:2) degrades HPAM with 120 min light radiation under the different reaction conditions.

| Comparative experiments | Reaction conditions                  | Degradation efficiencies |
|-------------------------|--------------------------------------|--------------------------|
| 1                       | No photocatalyst                     | 0.85 %                   |
| 2                       | No light radiation                   | 8.63 %                   |
| 3                       | No photocatalyst and light radiation | -                        |

**Table S2.** The apparent rate constant and the correlation coefficient (R<sup>2</sup>) of the all the catalysts in the degradation of HPAM.

| Catalysts                                                               | slope    | R <sup>2</sup> | K <sub>app</sub> min <sup>-1</sup> |
|-------------------------------------------------------------------------|----------|----------------|------------------------------------|
| g-C <sub>3</sub> N <sub>4</sub>                                         | -0.00191 | 0.009836       | 0.00191                            |
| α-Fe <sub>2</sub> O <sub>3</sub>                                        | -0.00282 | 0.009827       | 0.00282                            |
| g-C <sub>3</sub> N <sub>4</sub> /α-Fe <sub>2</sub> O <sub>3</sub> (3:1) | -0.00371 | 0.009883       | 0.00371                            |
| g-C <sub>3</sub> N <sub>4</sub> /α-Fe <sub>2</sub> O <sub>3</sub> (2:1) | -0.00547 | 0.009865       | 0.00547                            |
| g-C <sub>3</sub> N <sub>4</sub> /α-Fe <sub>2</sub> O <sub>3</sub> (1:1) | -0.00864 | 0.009903       | 0.00864                            |
| g-C <sub>3</sub> N <sub>4</sub> /α-Fe <sub>2</sub> O <sub>3</sub> (1:2) | -0.01747 | 0.009886       | 0.01747                            |
| g-C <sub>3</sub> N <sub>4</sub> /α-Fe <sub>2</sub> O <sub>3</sub> (1:3) | -0.01194 | 0.009925       | 0.01194                            |

**Table S3.** Summary of PL lifetime and electron transfer rate constant of samples fitted by double-exponential model.

| Catalysts                                                               | τ <sub>1</sub> /ns | A <sub>1</sub> /% | T <sub>2</sub> /ns | A <sub>2</sub> /% | <τ>/ns |
|-------------------------------------------------------------------------|--------------------|-------------------|--------------------|-------------------|--------|
| g-C <sub>3</sub> N <sub>4</sub>                                         | 1.62               | 40.3              | 6.88               | 59.7              | 4.76   |
| g-C <sub>3</sub> N <sub>4</sub> /α-Fe <sub>2</sub> O <sub>3</sub> (1:2) | 2.39               | 41.2              | 11.48              | 58.8              | 7.74   |

The obtained decay profile can be reasonably fitted to a doubleexponential model:

$$\langle \tau \rangle = (A_1\tau_1^2 + A_2\tau_2^2) / (A_1\tau_1 + A_2\tau_2)$$

where,  $\langle \tau \rangle$  is the average PL lifetime,  $\tau_1$  and  $\tau_2$  are the decay time constants, and  $A_1$  and  $A_2$  are the corresponding magnitudes.

**Table S4.** The apparent rate constant and the correlation coefficient ( $R^2$ ) of the all the catalysts in the degradation of HPAM.

| Photocatalysts                                                                            | Process               | Rate of degradation | Refences                                                      |
|-------------------------------------------------------------------------------------------|-----------------------|---------------------|---------------------------------------------------------------|
| <b>g-C<sub>3</sub>N<sub>4</sub>/<math>\alpha</math>-Fe<sub>2</sub>O<sub>3</sub> (1:2)</b> | Photocatalysis        | 90 %                | This work                                                     |
| <b>ZnO</b>                                                                                | Photocatalysis        | 74 %                | Chemical Engineering Journal, 2018, 351, 56                   |
| <b>Au/BiVO<sub>4</sub></b>                                                                | Photocatalysis        | 80.37%              | Industrial Water Treatment, 2021, 41, 74.                     |
| <b>tBu-TPyzPzCo</b>                                                                       | Photoelectrocatalysis | 94.55%              | Catalysts 2021, 11, 181.                                      |
| <b>STSR</b>                                                                               | Photocatalysis        | 92.8%               | Journal of Physics and Chemistry of Solids, 2021, 149, 109775 |
| <b>GCN/PAN</b>                                                                            | Photocatalysis        | 90.2%               | Arabian Journal of Chemistry, 2020, 13, 4341                  |
| <b>STT-700</b>                                                                            | Photocatalysis        | 88.2%               | RSC Advanced, 2019, 9, 30790                                  |
| <b>Eu<sup>3+</sup>/TiO<sub>2</sub>-2.4</b>                                                | Photocatalysis        | 83%                 | Applied Surface Science, 2009. 255, 3731                      |
| <b>tBu-TPyzPzCo</b>                                                                       | Photoelectrocatalysis | 94.55%              | RSC Advanced, 2017, 7, 55496                                  |
| <b>Au/TiO<sub>2</sub></b>                                                                 | Photoelectrocatalysis | 43.84%              | RSC Advanced, 2016, 6, 63711                                  |

#### Reference

1. S. Yang, Y. Gong, J. Zhang, L. Zhan, L. Ma, Z. Fang, R. Vajtai, X. Wang and P. M. Ajayan, Exfoliated Graphitic Carbon Nitride Nanosheets as Efficient Catalysts for Hydrogen Evolution Under Visible Light, *Advanced Materials*, 2013, **25**, 2452-2456.
2. L. Chen, X. Yang, J. Chen, J. Liu, H. Wu, H. Zhan, C. Liang and M. Wu,

Continuous Shape- and Spectroscopy-Tuning of Hematite Nanocrystals, *Inorganic Chemistry*, 2010, **49**, 8411-8420.

3. Q. Xu, B. Zhu, C. Jiang, B. Cheng and J. Yu, Constructing 2D/2D Fe<sub>2</sub>O<sub>3</sub>/g-C<sub>3</sub>N<sub>4</sub> Direct Z-Scheme Photocatalysts with Enhanced H<sub>2</sub> Generation Performance, *Solar RRL*, 2018, **2**, 1800006.
